# Supplementary material for: Myostatin Inhibition in Muscle, but Not Adipose Tissue, Decreases Fat Mass and Improves Insulin Sensitivity
Source: PubMed Central journal article supplement (PMC2654157; doi:10.1371/journal.pone.0004937), 2009-03-19
Supplement: pone.0004937.s001.pdf [file pone.0004937.s001.pdf]

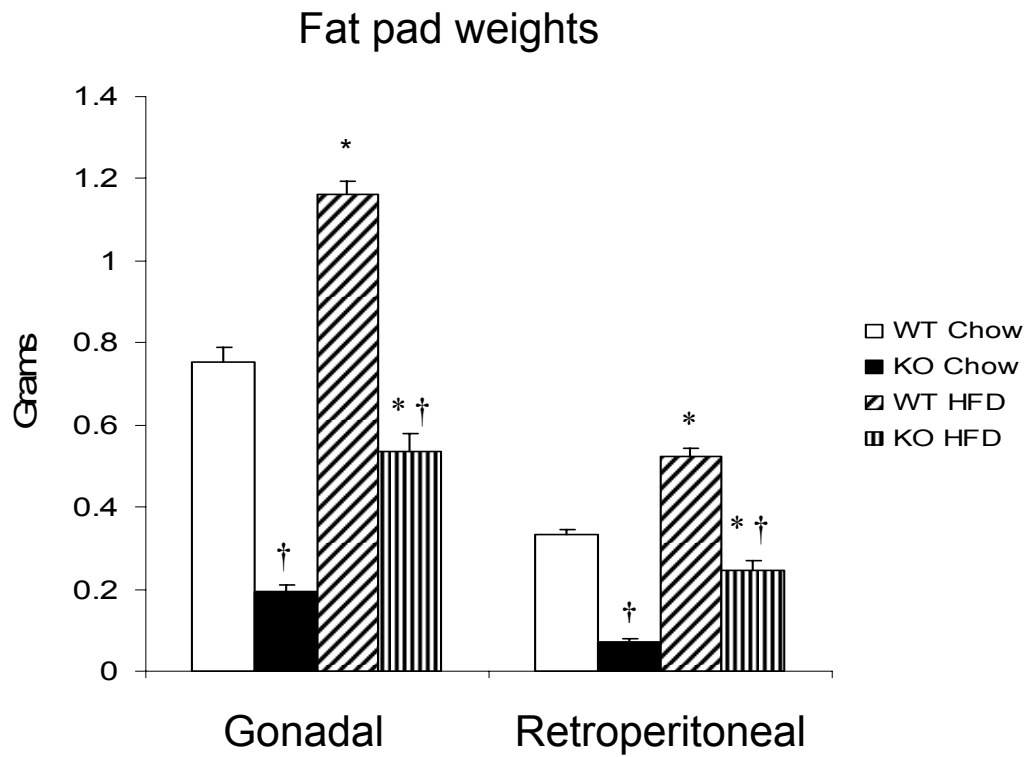

**Figure S1**

Fat pad mass of *Mstn*<sup>+/+</sup> and *Mstn*<sup>-/-</sup> mice on standard chow or HFD. *n* = 7-16. \**P* < 0.001 vs. same genotype on standard chow. †*P* < 0.001 vs. WT control on same diet.
