# Supplementary material for: Myostatin Inhibition in Muscle, but Not Adipose Tissue, Decreases Fat Mass and Improves Insulin Sensitivity
Source: PubMed Central journal article supplement (PMC2654157; doi:10.1371/journal.pone.0004937), 2009-03-19
Supplement: pone.0004937.s002.pdf [file pone.0004937.s002.pdf]

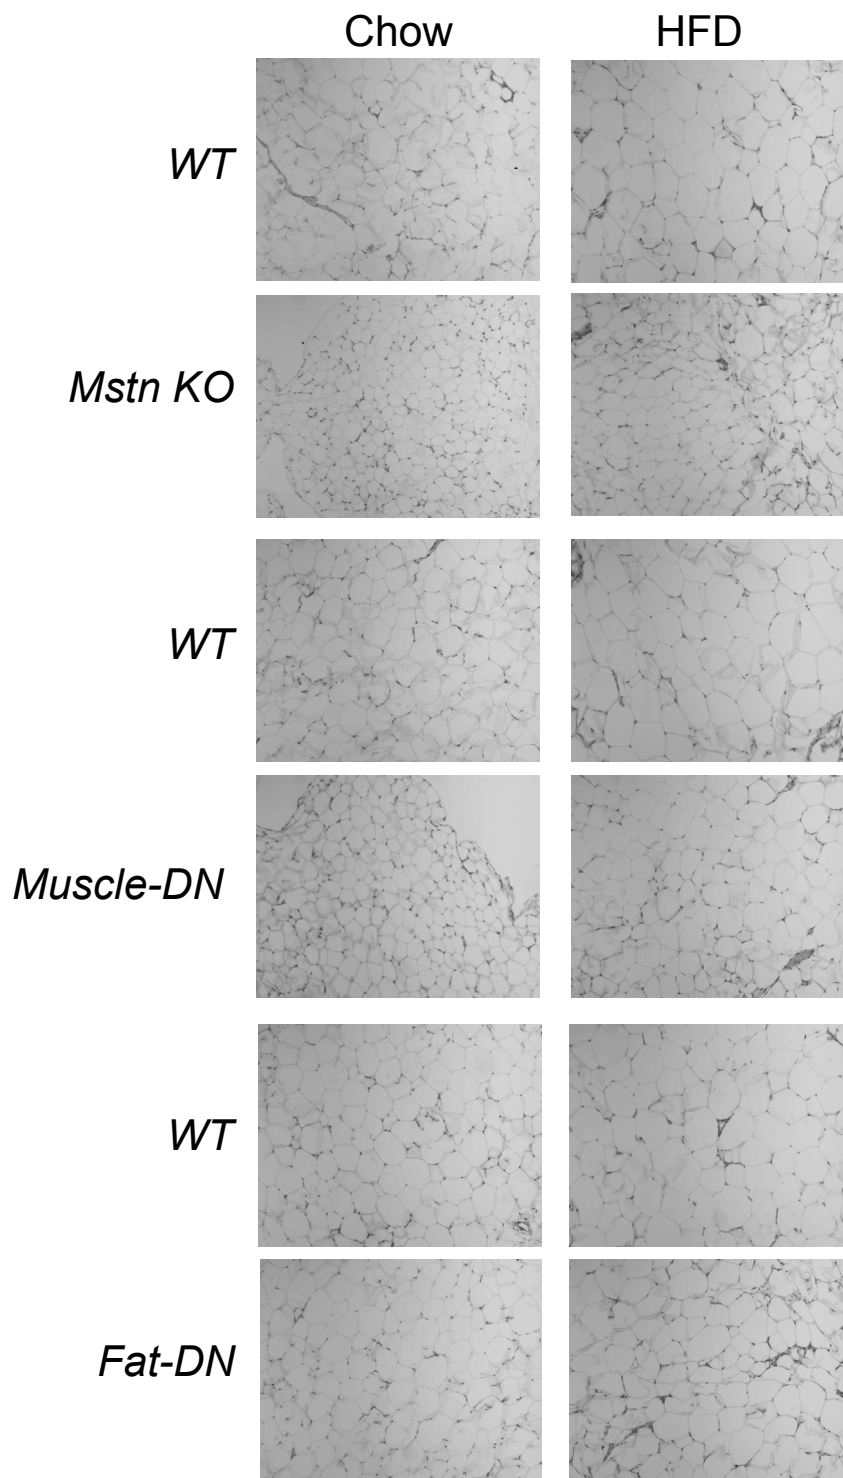

**Figure S2**

Representative images of H&E stained gonadal fat pads from mutant mice and control littermates on standard chow or high fat diet (HFD). *Mstn*<sup>-/-</sup> and *muscle-DN* mice, but not *fat-DN* mice, have smaller adipocytes compared to control mice on both diets.
