# Supplementary material for: Myostatin Inhibition in Muscle, but Not Adipose Tissue, Decreases Fat Mass and Improves Insulin Sensitivity
Source: PubMed Central journal article supplement (PMC2654157; doi:10.1371/journal.pone.0004937), 2009-03-19
Supplement: pone.0004937.s003.pdf [file pone.0004937.s003.pdf]

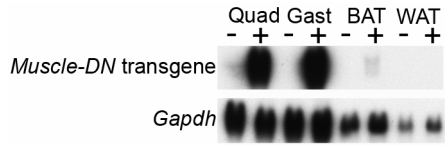

**Figure S3**

Northern blot analysis of expression of *muscle-DN* transgene and *Gapdh* loading control from non-transgenic (-) and transgenic (+) mice. Faint transgene expression was seen in brown adipose tissue (BAT). Quad, quadriceps muscle; Gast, gastrocnemius muscle; WAT, white adipose tissue. Twenty micrograms total RNA was run per lane.
