# Supplementary material for: Myostatin Inhibition in Muscle, but Not Adipose Tissue, Decreases Fat Mass and Improves Insulin Sensitivity
Source: PubMed Central journal article supplement (PMC2654157; doi:10.1371/journal.pone.0004937), 2009-03-19
Supplement: pone.0004937.s004.pdf [file pone.0004937.s004.pdf]

**Table S1**  
Indirect calorimetry

|                                                            | <i>Mstn</i> <sup>+/+</sup> | <i>Mstn</i> <sup>-/-</sup> | <i>P</i> value |                            |                            |                |
|------------------------------------------------------------|----------------------------|----------------------------|----------------|----------------------------|----------------------------|----------------|
| Body weight (g)                                            | 32.7 ± 0.8                 | 35.3 ± 0.4                 | 0.028          |                            |                            |                |
| Lean mass (g)                                              | 23.1 ± 0.4                 | 31.7 ± 0.3                 | <0.001         |                            |                            |                |
| Fat mass (g)                                               | 9.5 ± 0.6                  | 3.3 ± 0.4                  | <0.001         |                            |                            |                |
|                                                            | 23°C                       |                            |                | 30°C                       |                            |                |
|                                                            | <i>Mstn</i> <sup>+/+</sup> | <i>Mstn</i> <sup>-/-</sup> | <i>P</i> value | <i>Mstn</i> <sup>+/+</sup> | <i>Mstn</i> <sup>-/-</sup> | <i>P</i> value |
| Energy expenditure (kcal/hr)                               |                            |                            |                |                            |                            |                |
| Resting                                                    | 0.56 ± 0.01                | 0.63 ± 0.01                | <0.001         | 0.37 ± 0.01                | 0.43 ± 0.01                | 0.002          |
| Total                                                      | 0.66 ± 0.01                | 0.73 ± 0.01                | 0.001          | 0.48 ± 0.02                | 0.54 ± 0.01                | 0.031          |
| Resting vO <sub>2</sub> (mL/hr)                            | 114.8 ± 2.5                | 128.6 ± 1.3                | <0.001         | 74.5 ± 2.3                 | 86.8 ± 2.0                 | 0.002          |
| Total vO <sub>2</sub> (mL/hr)                              | 141.3 ± 3.9                | 146.3 ± 3.9                | 0.390          | 102.7 ± 4.5                | 105.9 ± 2.8                | 0.599          |
| Resting vO <sub>2</sub> (mL/hr/lean mass <sup>0.75</sup> ) | 10.9 ± 0.2                 | 9.6 ± 0.1                  | <0.001         | 7.1 ± 0.2                  | 6.5 ± 0.2                  | 0.055          |
| Total vO <sub>2</sub> (mL/hr/lean mass <sup>0.75</sup> )   | 13.4 ± 0.3                 | 11.0 ± 0.3                 | <0.001         | 9.7 ± 0.4                  | 7.9 ± 0.2                  | 0.003          |
| Resting RER (vCO <sub>2</sub> /vO <sub>2</sub> )           | 0.837 ± 0.016              | 0.861 ± 0.017              | 0.354          | 0.871 ± 0.019              | 0.935 ± 0.013              | 0.024          |
| Total RER (vCO <sub>2</sub> /vO <sub>2</sub> )             | 0.843 ± 0.015              | 0.889 ± 0.008              | 0.035          | 0.862 ± 0.017              | 0.945 ± 0.012              | 0.003          |
| Activity (beam breaks/min)                                 |                            |                            |                |                            |                            |                |
| Total                                                      | 185.2 ± 29.8               | 143.2 ± 30.7               | 0.355          | 159.4 ± 21.7               | 119.6 ± 12.0               | 0.176          |
| Ambulating                                                 | 57.2 ± 14.7                | 45.6 ± 12.2                | 0.578          | 44.2 ± 9.5                 | 27.9 ± 4.8                 | 0.200          |

All data are expressed as mean ± SEM (*Mstn*<sup>+/+</sup>, *n* = 10 and *Mstn*<sup>-/-</sup>, *n* = 7). *P* values < 0.05 were considered significant.

**Table S2**  
Liver triglyceride concentration on standard or HFD

|                            | Liver triglyceride ( $\mu\text{mol/g}$ ) | <i>P</i> value<br>(between diets<br>within a<br>genotype) | <i>P</i> value<br>(versus control<br>within a diet) |
|----------------------------|------------------------------------------|-----------------------------------------------------------|-----------------------------------------------------|
| <b>Standard Chow</b>       |                                          |                                                           |                                                     |
| <i>Mstn</i> <sup>+/+</sup> | 22.5 $\pm$ 2.4                           |                                                           |                                                     |
| <i>Mstn</i> <sup>-/-</sup> | 6.1 $\pm$ 1.0                            |                                                           | 0.036                                               |
| <b>HFD</b>                 |                                          |                                                           |                                                     |
| <i>Mstn</i> <sup>+/+</sup> | 73.3 $\pm$ 6.3                           | <0.001                                                    |                                                     |
| <i>Mstn</i> <sup>-/-</sup> | 24.8 $\pm$ 3.0                           | 0.004                                                     | <0.001                                              |
| <b>Standard Chow</b>       |                                          |                                                           |                                                     |
| <i>Non-transgenic</i>      | 18.6 $\pm$ 1.2                           |                                                           |                                                     |
| <i>Muscle-DN</i>           | 11.4 $\pm$ 1.1                           |                                                           | 1.000                                               |
| <b>HFD</b>                 |                                          |                                                           |                                                     |
| <i>Non-transgenic</i>      | 23.3 $\pm$ 2.3                           | 0.282                                                     |                                                     |
| <i>Muscle-DN</i>           | 16.2 $\pm$ 1.1                           | 0.341                                                     | 1.000                                               |
| <b>Standard Chow</b>       |                                          |                                                           |                                                     |
| <i>Non-transgenic</i>      | 19.9 $\pm$ 1.5                           |                                                           |                                                     |
| <i>Fat-DN</i>              | 20.4 $\pm$ 2.0                           |                                                           | 1.000                                               |
| <b>HFD</b>                 |                                          |                                                           |                                                     |
| <i>Non-transgenic</i>      | 50.8 $\pm$ 5.1                           | <0.001                                                    |                                                     |
| <i>Fat-DN</i>              | 40.8 $\pm$ 3.6                           | <0.001                                                    | 0.321                                               |

Data are expressed as mean  $\pm$  SEM of 4-11 per group.
