# Supplementary material for: Myostatin Inhibition in Muscle, but Not Adipose Tissue, Decreases Fat Mass and Improves Insulin Sensitivity
Source: PubMed Central journal article supplement (PMC2654157; doi:10.1371/journal.pone.0004937), 2009-03-19
Supplement: pone.0004937.s005.pdf [file pone.0004937.s005.pdf]

**Table S2**

Liver triglyceride concentration on standard or HFD

|                            | Liver triglyceride ( $\mu\text{mol/g}$ ) | <i>P</i> value<br>(between diets<br>within a<br>genotype) | <i>P</i> value<br>(versus control<br>within a diet) |
|----------------------------|------------------------------------------|-----------------------------------------------------------|-----------------------------------------------------|
| <b>Standard Chow</b>       |                                          |                                                           |                                                     |
| <i>Mstn</i> <sup>+/+</sup> | 22.5 $\pm$ 2.4                           |                                                           |                                                     |
| <i>Mstn</i> <sup>-/-</sup> | 6.1 $\pm$ 1.0                            |                                                           | 0.036                                               |
| <b>HFD</b>                 |                                          |                                                           |                                                     |
| <i>Mstn</i> <sup>+/+</sup> | 73.3 $\pm$ 6.3                           | <0.001                                                    |                                                     |
| <i>Mstn</i> <sup>-/-</sup> | 24.8 $\pm$ 3.0                           | 0.004                                                     | <0.001                                              |
| <b>Standard Chow</b>       |                                          |                                                           |                                                     |
| Non-transgenic             | 18.6 $\pm$ 1.2                           |                                                           |                                                     |
| <i>Muscle-DN</i>           | 11.4 $\pm$ 1.1                           |                                                           | 1.000                                               |
| <b>HFD</b>                 |                                          |                                                           |                                                     |
| Non-transgenic             | 23.3 $\pm$ 2.3                           | 0.282                                                     |                                                     |
| <i>Muscle-DN</i>           | 16.2 $\pm$ 1.1                           | 0.341                                                     | 1.000                                               |
| <b>Standard Chow</b>       |                                          |                                                           |                                                     |
| Non-transgenic             | 19.9 $\pm$ 1.5                           |                                                           |                                                     |
| <i>Fat-DN</i>              | 20.4 $\pm$ 2.0                           |                                                           | 1.000                                               |
| <b>HFD</b>                 |                                          |                                                           |                                                     |
| Non-transgenic             | 50.8 $\pm$ 5.1                           | <0.001                                                    |                                                     |
| <i>Fat-DN</i>              | 40.8 $\pm$ 3.6                           | <0.001                                                    | 0.321                                               |

Data are expressed as mean  $\pm$  SEM of 4-11 per group.
